# Supplementary material
Source: PubMed Central journal article supplement (PMC4049964)

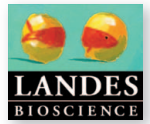

## **Supplemental Material to:**

**Lei Zhang, Qian Zhou, Ning Zhang, Weixu Li, Meidan Ying,  
Wanjing Ding, Bo Yang, and Qiaojun He**

**E2F1 impairs all-trans retinoic acid-induced osteogenic  
differentiation of osteosarcoma via promoting  
ubiquitination-mediated degradation of RAR $\alpha$**

**Cell Cycle 2014; 13(8)**

**<http://dx.doi.org/10.4161/cc.28190>**

**<http://www.landesbioscience.com/journals/cc/article/28190>**

# Figure S1

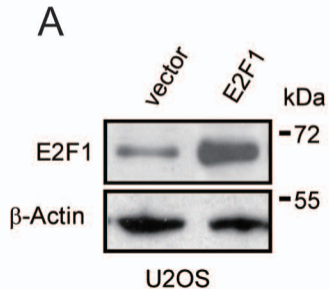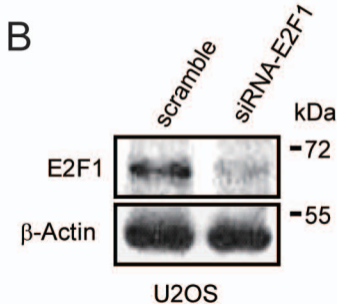

# Figure S2

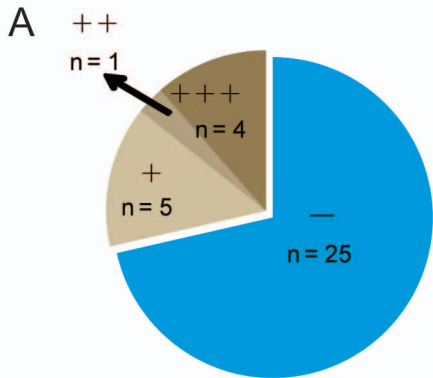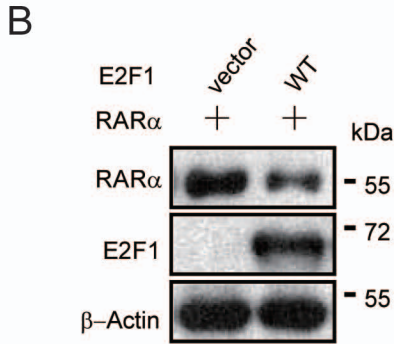

**Figure S3**

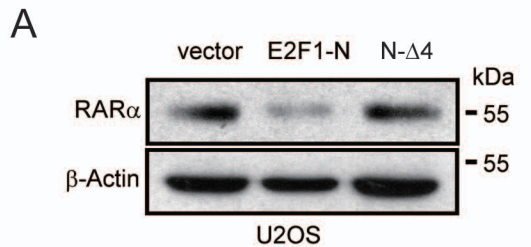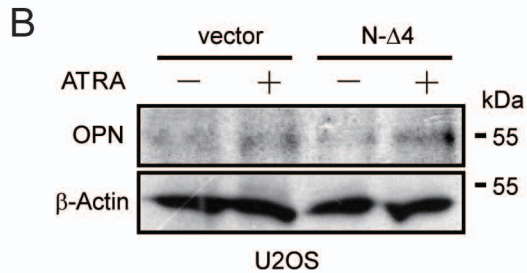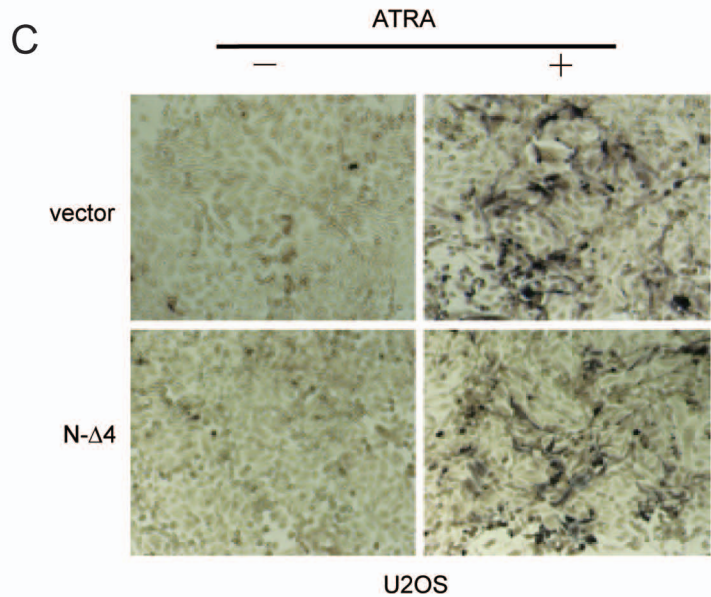

**Figure S4****A**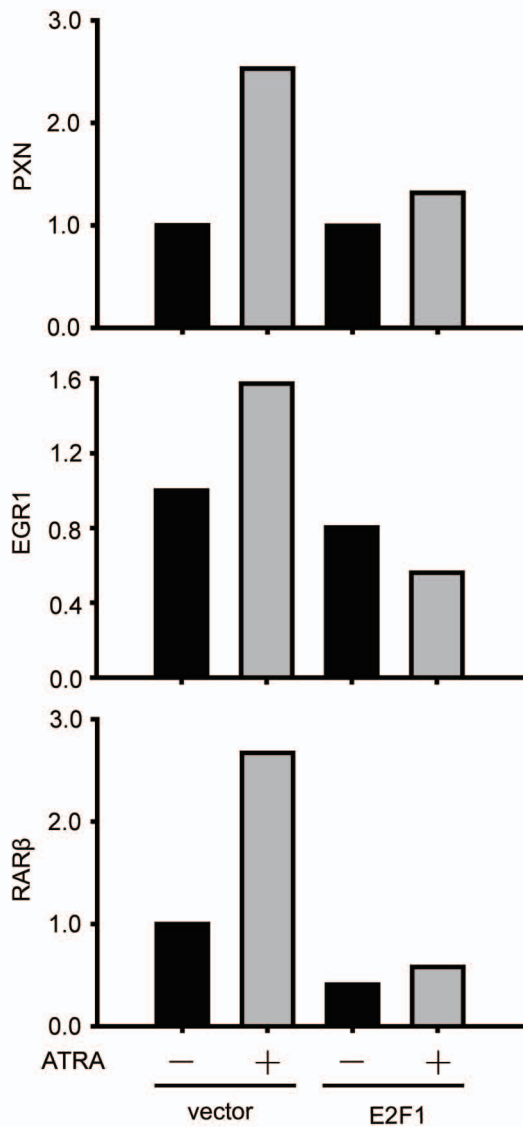**B**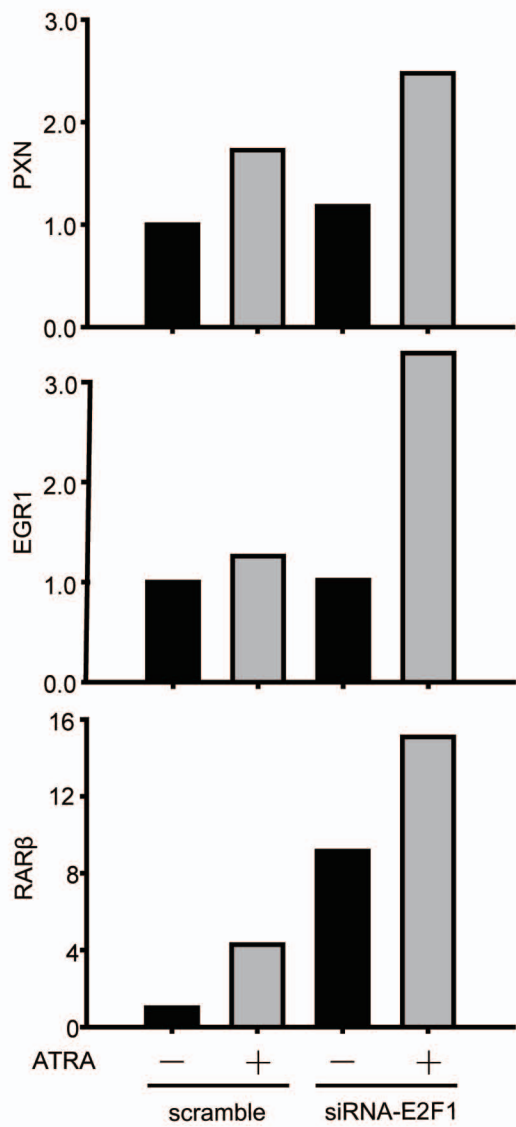

Supplement: cc-13-1277-s01.pdf [file cc-13-1277-s01.pdf]
